# Supplementary material for: Development of a powdered activated charcoal sodium alginate hydrogel bead concentration method for detecting viruses in wastewater
Source: Royal Society of Chemistry journal article supplement (doi:10.1039/d4ew00370e), 2024-06-12
Supplement: d4ew00370e1.xlsx [file d4ew00370e1.xlsx]

## Sheet: Sheet1
Study Description	Environmental Sampling	Sample Treatment	Sample Reduction	Nucleic-acid Extraction	Reverse Transcription	PCR Amplification	Analysis
	Notes: Described in methods	Notes: None	Notes: Described in methods (Hydrogel-based method)	Notes: Described in methods	Notes: Described in methods	Notes: Described in methods	Notes: Described in methods
Control Checklist	Environmental Sampling	Sample Treatment	Sample Reduction	Nucleic-acid Extraction	Reverse Transcription	PCR Amplification
Step performed
Step has control info							Negative controls
# of control replicates	0		0	0	2	2
Control result reported
Method for handling failed controls described
Step has control info							Positive controls
Control identity described
Control quantification method described
# control replicates	2-3		2-3	2-3	2	2
Control result reported
Method for handling failed controls described
Process checklist
Environmental Sampling		Nucleic-acid Extraction		qPCR or dPCR		Analysis- dPCR
Sample procedure		Extraction procedure		Target gene name, amplicon length		Threshold settings
Number of samples		Volume or mass extracted, volume or mass obtained		Thermocycling temp and times		Technical replicates, number, well merging
Sample amount, mean, range		Extract storage conditions		Master mix composition: vendors, concentrations		Partitions measured, number, mean, variance
Sampling locations, dates, times		Reverse Transcription		Additives: vendors, composition		Partition volume
Sample storage conditions		One- or two-step		Template amount added, pre-treatment (if any)		Target copies per partition, mean, variance
Sample Treatment		cDNA storage conditions (if 2 step)		Primers: sequences, concentrations, vendors, references		Program used for dPCR analysis
Treatment procedure		Reaction temperatures and times		Amplicon confirmation method (probe, melt curve details, etc)		Explanation of control results, example plots
Reagents		Reaction reagents and concentrations		Probe sequence, concentration, vendor, reference		Analysis- qPCR
Sample Reduction		Priming method		Instrumentation		Technical replicates, number, calculations
Reduction procedure		Reaction volume, added template amount		Inhibition assessment procedure		Calibration standards, description, source
Reagents		RT efficiency assessment procedure (if 2-step)		Inhibition control description (if used)		Method of quantifying standards
Concentration factor		RT control description (if two-step)		Number of samples tested and found inhibited		Calibration curve slope
		RT efficiency reported (if 2-step)		Equivalent volume of sample analyzed		Calibration curve R2
						Lowest standard measured or 95% LOD
Note to users: This checklist is provided as guidance for best practices for reporting, but is not meant to be prescriptive. Not all items in the check list will apply to all studies. Please see Borchardt et al. The Environmental Microbiology Minimum Information (EMMI) Guidelines: qPCR and dPCR Quality and Reporting for Environmental Microbiology. Environmental Science & Technology, 2021, 55, 15,…						Cq value determination methods
Version 3.0
This version maintained by Borchardt, Boehm, Salit, Noble, Wiggington, Spencer
Date: 18 October 2023
