# Supplementary material for: Development of a powdered activated charcoal sodium alginate hydrogel bead concentration method for detecting viruses in wastewater
Source: Royal Society of Chemistry journal article supplement (doi:10.1039/d4ew00370e), 2024-06-12
Supplement: d4ew00370e2.pdf [file d4ew00370e2.pdf]

### Supplemental Figures and Tables

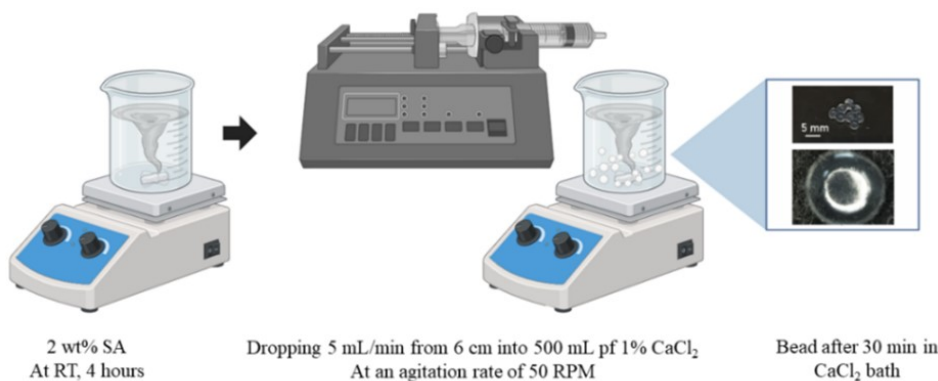

**Figure S1.** Schematic diagram showing the formation of NaA beads.

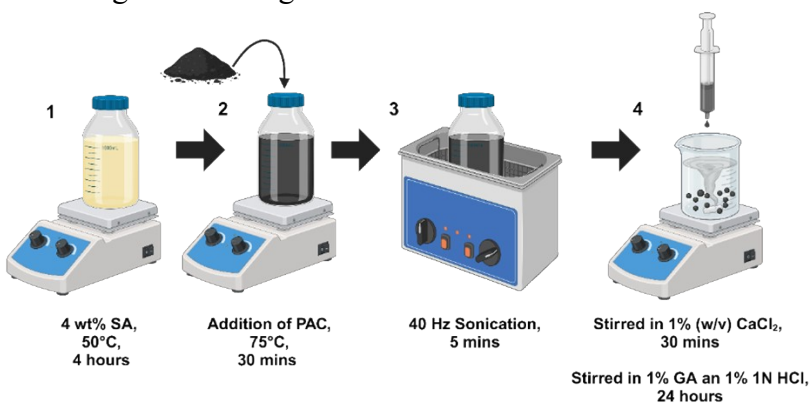

**Figure S2.** Sequence of steps in the preparation of PAC-Alginate Hydrogel beads

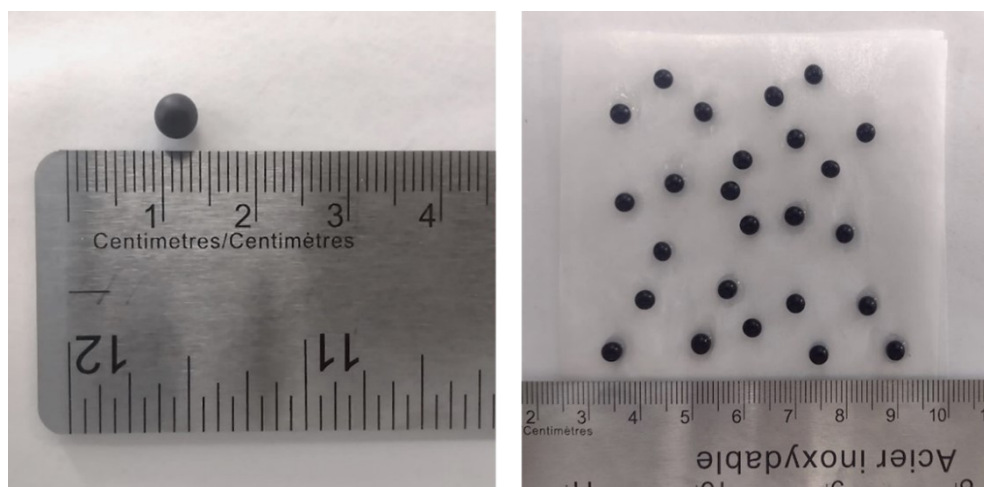

**Figure S3.** Images of PAC-NaA hydrogel beads.

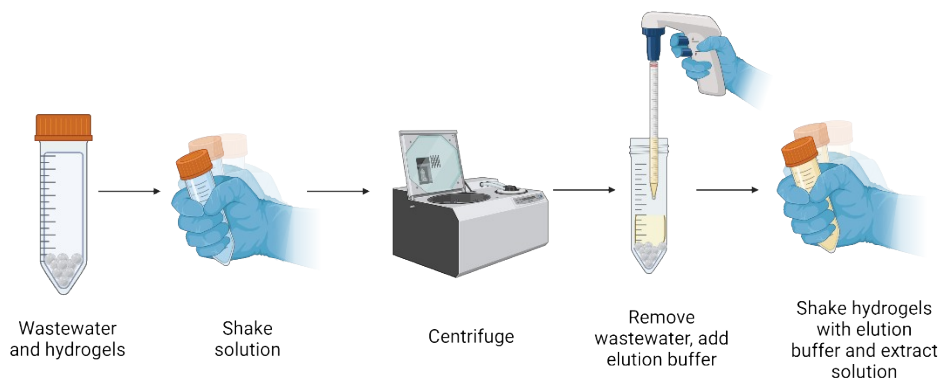

**Figure S4.** Schematic diagram of PAC-NaA hydrogel virus concentration procedure.

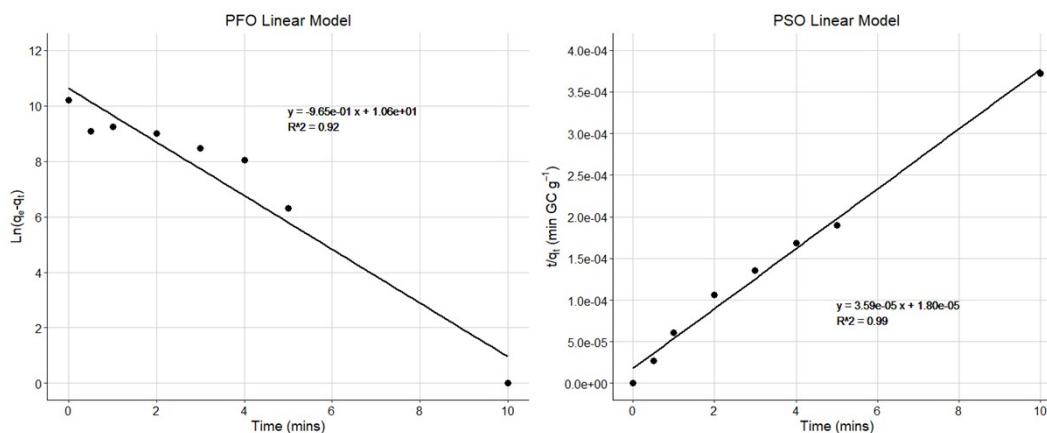

**Figure S5.** LPFO and LPSO kinetic models.

**Table S1.** Annual average physiochemical parameters of raw wastewater from Plant A and B. Total suspended solids (TSS), total biological oxygen demand (BOD), temperature, pH and daily average flow.

| Location | TSS (mg/L) | BOD (mg/L) | Temperature (°C) | pH  | Daily Flow (m <sup>3</sup> /day) |
|----------|------------|------------|------------------|-----|----------------------------------|
| Plant A  | 214        | 133        | 10.2             | 7.2 | 32941                            |
| Plant B  | 148        | 79.3       | 11.6             | 7.0 | 10794                            |
